# Supplementary material for: Lactucin ameliorates FFA-induced steatosis in HepG2 cells by modulating mitochondrial homeostasis through the SIRT1/PGC-1α signaling axis
Source: PubMed Central journal article supplement — Heliyon. 2024 Oct 26;10(21):e39890. doi: 10.1016/j.heliyon.2024.e39890 (PMC11550614; doi:10.1016/j.heliyon.2024.e39890), 2024-10-26

Dear editor,

For Western Blot experiments, we will provide the following original materials.

I have a question to explain to you. As our laboratory uses film development exposure for the final step of the Western Blot experiment, rather than instrument exposure, no Marker strips will be exposed on the film. We mark the Nitrocellulose filter membrane accordingly before exposure, and at the same time, mark the original film accordingly to ensure the accuracy of the experimental data. We will mark the original images provided below according to the corresponding positions of the experimental results. (Note: The background difference is caused by the intensity of the photographed light and the scanning film.)

#### 3.4. Effects of lactucin on the SIRT1/PGC-1 $\alpha$ signaling axis and mitochondrial biosynthesis-related gene expression in FFA-induced HepG2 cells

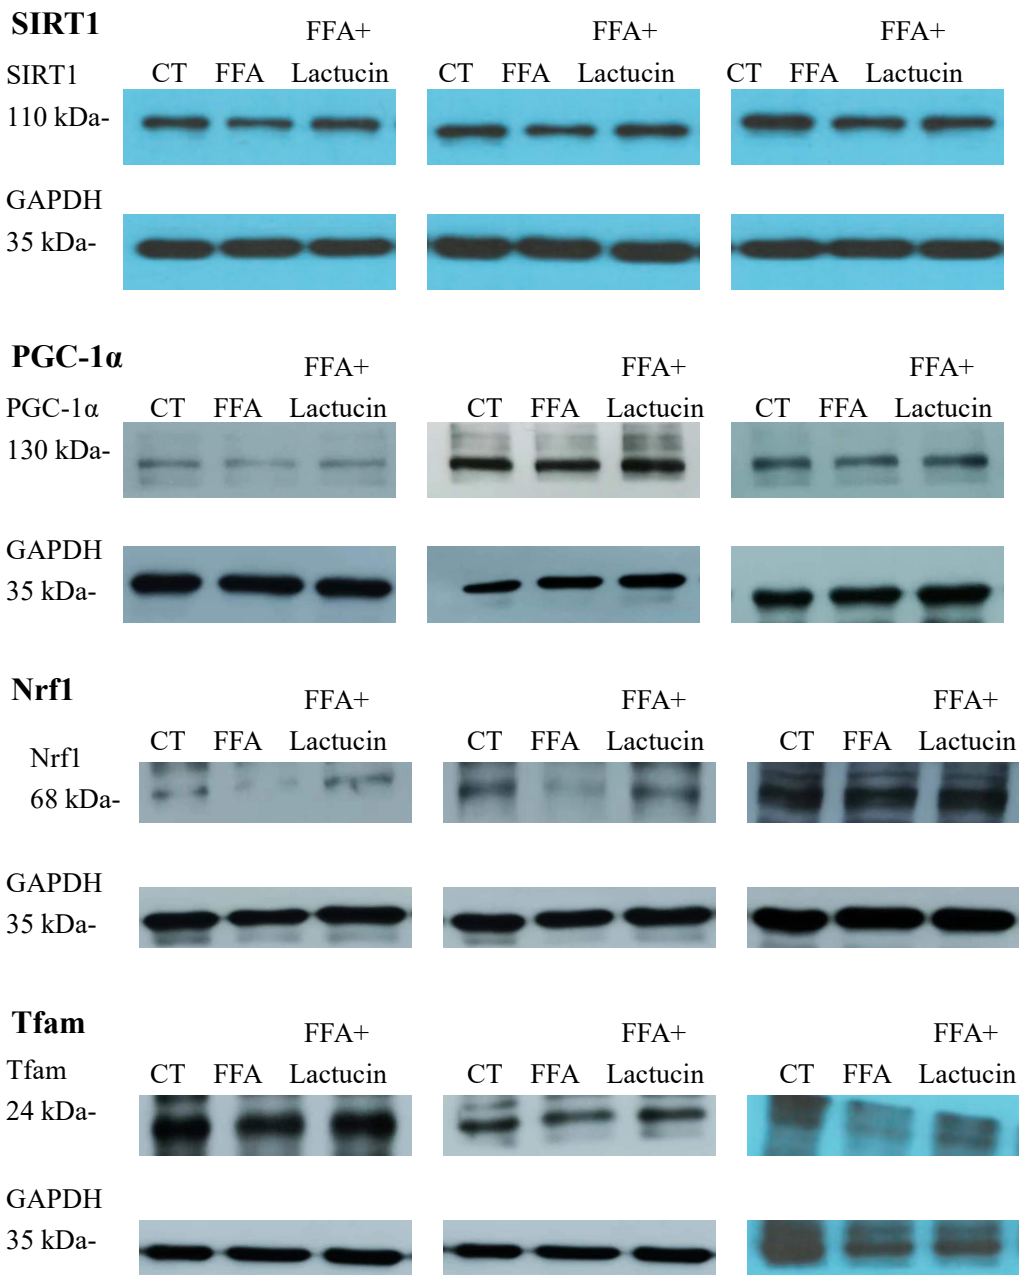

### 3.5. Effect of lactucin on the expression of genes related to mitochondrial dynamics in HepG2 cells induced by FFA

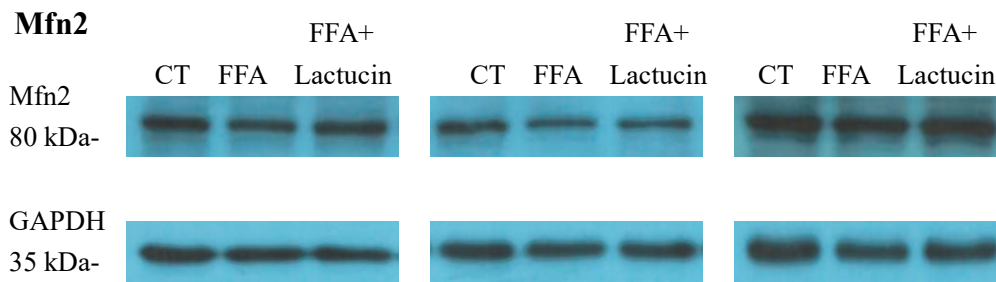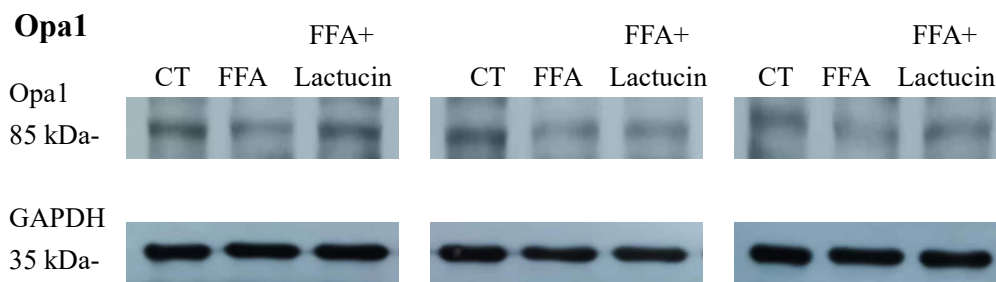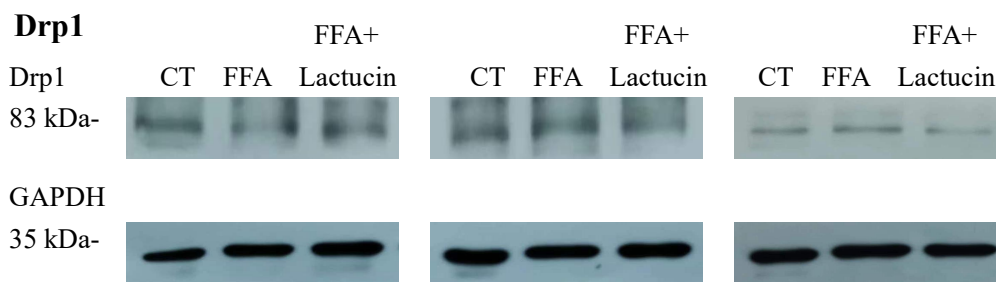

### 3.7. Effects of SIRT1 inhibition on mitochondrial quality control-related proteins

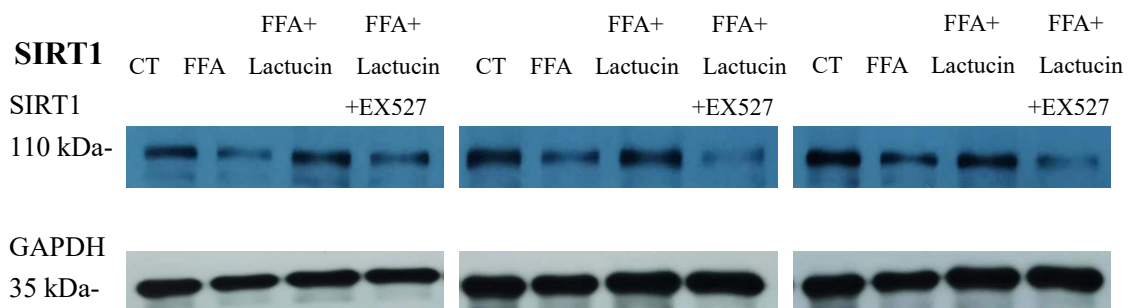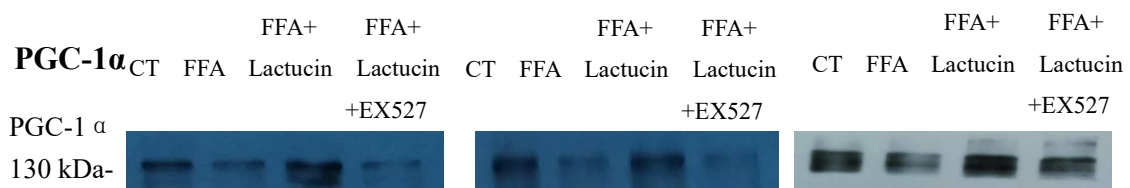

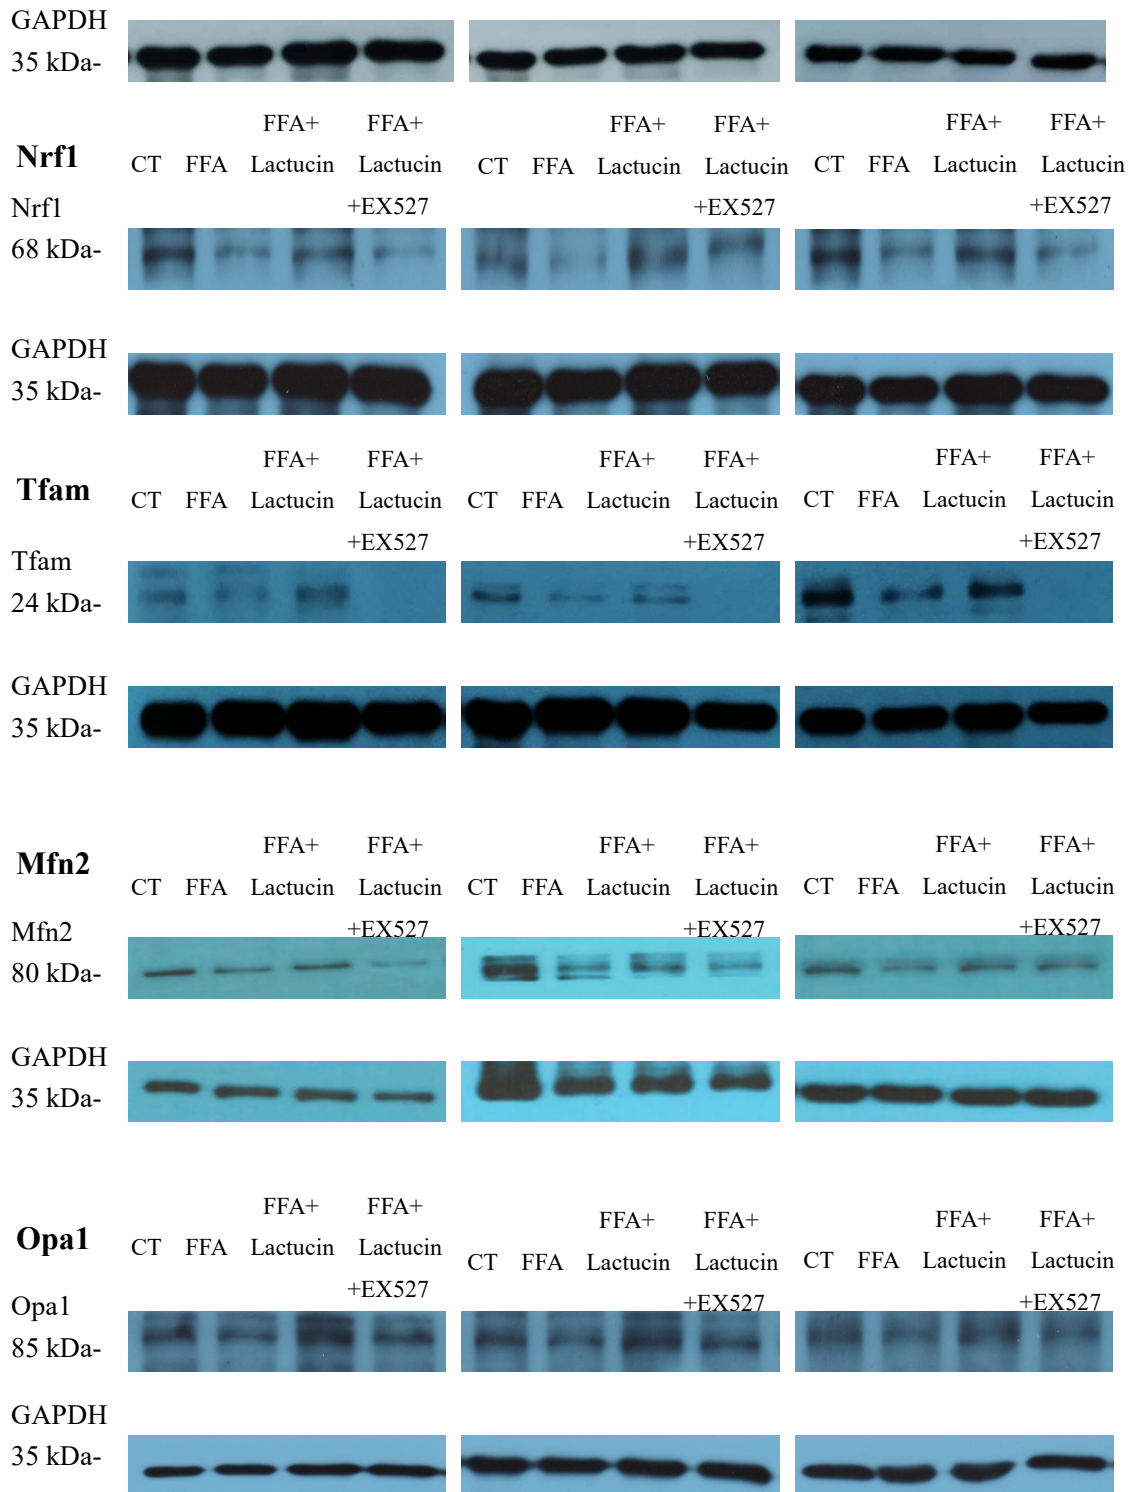

Supplement: mmc2.pdf [file mmc2.pdf]
