# Supplementary material for: Lactucin ameliorates FFA-induced steatosis in HepG2 cells by modulating mitochondrial homeostasis through the SIRT1/PGC-1α signaling axis
Source: PubMed Central journal article supplement — Heliyon. 2024 Oct 26;10(21):e39890. doi: 10.1016/j.heliyon.2024.e39890 (PMC11550614; doi:10.1016/j.heliyon.2024.e39890), 2024-10-26
Supplement: mmc4.pdf [file mmc4.pdf]

## Hep G2 细胞 STR 鉴定报告

### 一、材料处理和检测方法

取适量细胞 (> 1×10<sup>6</sup>)，使用 Tsingke 的动物基因组抽提试剂盒 (货号 TSP201-200) 提取细胞的基因组 DNA。使用新海生物的 NuHi SU9 dNTP Mix (货号 NH9347) 对 19 个 STR 位点以及性别位点 Amelogenin 进行扩增。使用 Cellosaurus STR 相似度搜索工具 CLASTR 对检测数据进行分析，同时与 ATCC, DSMZ, JCRB 和 RIKEN 等多个细胞库以及文献资料进行比对。

### 二、检验结果

| 样品编号   | 多等位基因 | 匹配细胞系  | 细胞库               | 匹配度    | 匹配说明 |
|--------|-------|--------|-------------------|--------|------|
| Hep G2 | 无     | Hep-G2 | PubMed (24116068) | 0.9846 | 基本匹配 |

- 多等位基因指三等位及以上基因现象。

### 三、鉴定结论:

- 1、本次检测各细胞分型结果良好。
- 2、该细胞株 DNA 分型在细胞库中匹配到与其细胞分型 **98.46%**相匹配的细胞株，细胞株名为：**Hep G2**。

### 备注:

- 1、根据国际细胞鉴定委员会 (ICLAC) 制定的细胞 STR 鉴定标准，当细胞系匹配度为 1.00 时是完全匹配；匹配度在 0.80 到 0.99 之间时认定检测细胞与细胞库里匹配到的细胞具有相关性；但当匹配度小于 0.80 时表明检测细胞与细胞库里匹配到的细胞 STR 位点差异较大，两者之间没有关联，不能对检测细胞进行鉴定。
- 2、STR 比对结果默认 ExPASy，服务器公开访问地址 (<https://web.expasy.org/cellosaurus-str-search>)。

附表：Hep G2 细胞的 STR 位点和 Amelogenin 位点的基因分型结果

| 细胞 HepG2 的 STR 位点和 Amelogenin 位点的基因分型结果 |              |         |         |                |         |         |
|-----------------------------------------|--------------|---------|---------|----------------|---------|---------|
| Loci                                    | 送检细胞 STR 信息  |         |         | 细胞库细胞 STR 信息   |         |         |
|                                         | 送检细胞名: HepG2 |         |         | 细胞库细胞名: Hep-G2 |         |         |
|                                         | Allele1      | Allele2 | Allele3 | Allele1        | Allele2 | Allele3 |
| D5S818                                  | 11           | 12      |         | 11             | 12      |         |
| D13S317                                 | 9            | 13      |         | 9              | 13      |         |
| D7S820                                  | 10           |         |         | 10             |         |         |
| D16S539                                 | 12           | 13      |         | 12             | 13      |         |
| VWA                                     | 17           |         |         | 17             |         |         |
| TH01                                    | 7            | 9       |         | 9              |         |         |
| AMEL                                    | X            | Y       |         | X              | Y       |         |
| TPOX                                    | 8            | 9       |         | 8              | 9       |         |
| CSF1PO                                  | 10           | 11      |         | 10             | 11      |         |
| D12S391                                 | 21           | 25      |         | 21             | 25      |         |
| FGA                                     | 22           | 25      |         | 22             | 25      |         |
| D2S1338                                 | 19           | 20      |         | 19             | 20      |         |
| D21S11                                  | 29           | 31      |         | 29             | 31      |         |
| D18S51                                  | 13           | 14      |         | 13             | 14      |         |
| D8S1179                                 | 15           | 16      |         | 15             | 16      |         |
| D3S1358                                 | 15           | 16      |         | 15             | 16      |         |
| D6S1043                                 | 13           |         |         |                |         |         |
| PENTAE                                  | 15           | 20      |         | 15             | 20      |         |
| D19S433                                 | 15.2         |         |         | 15.2           |         |         |
| PENTAD                                  | 9            | 13      |         | 9              | 13      |         |

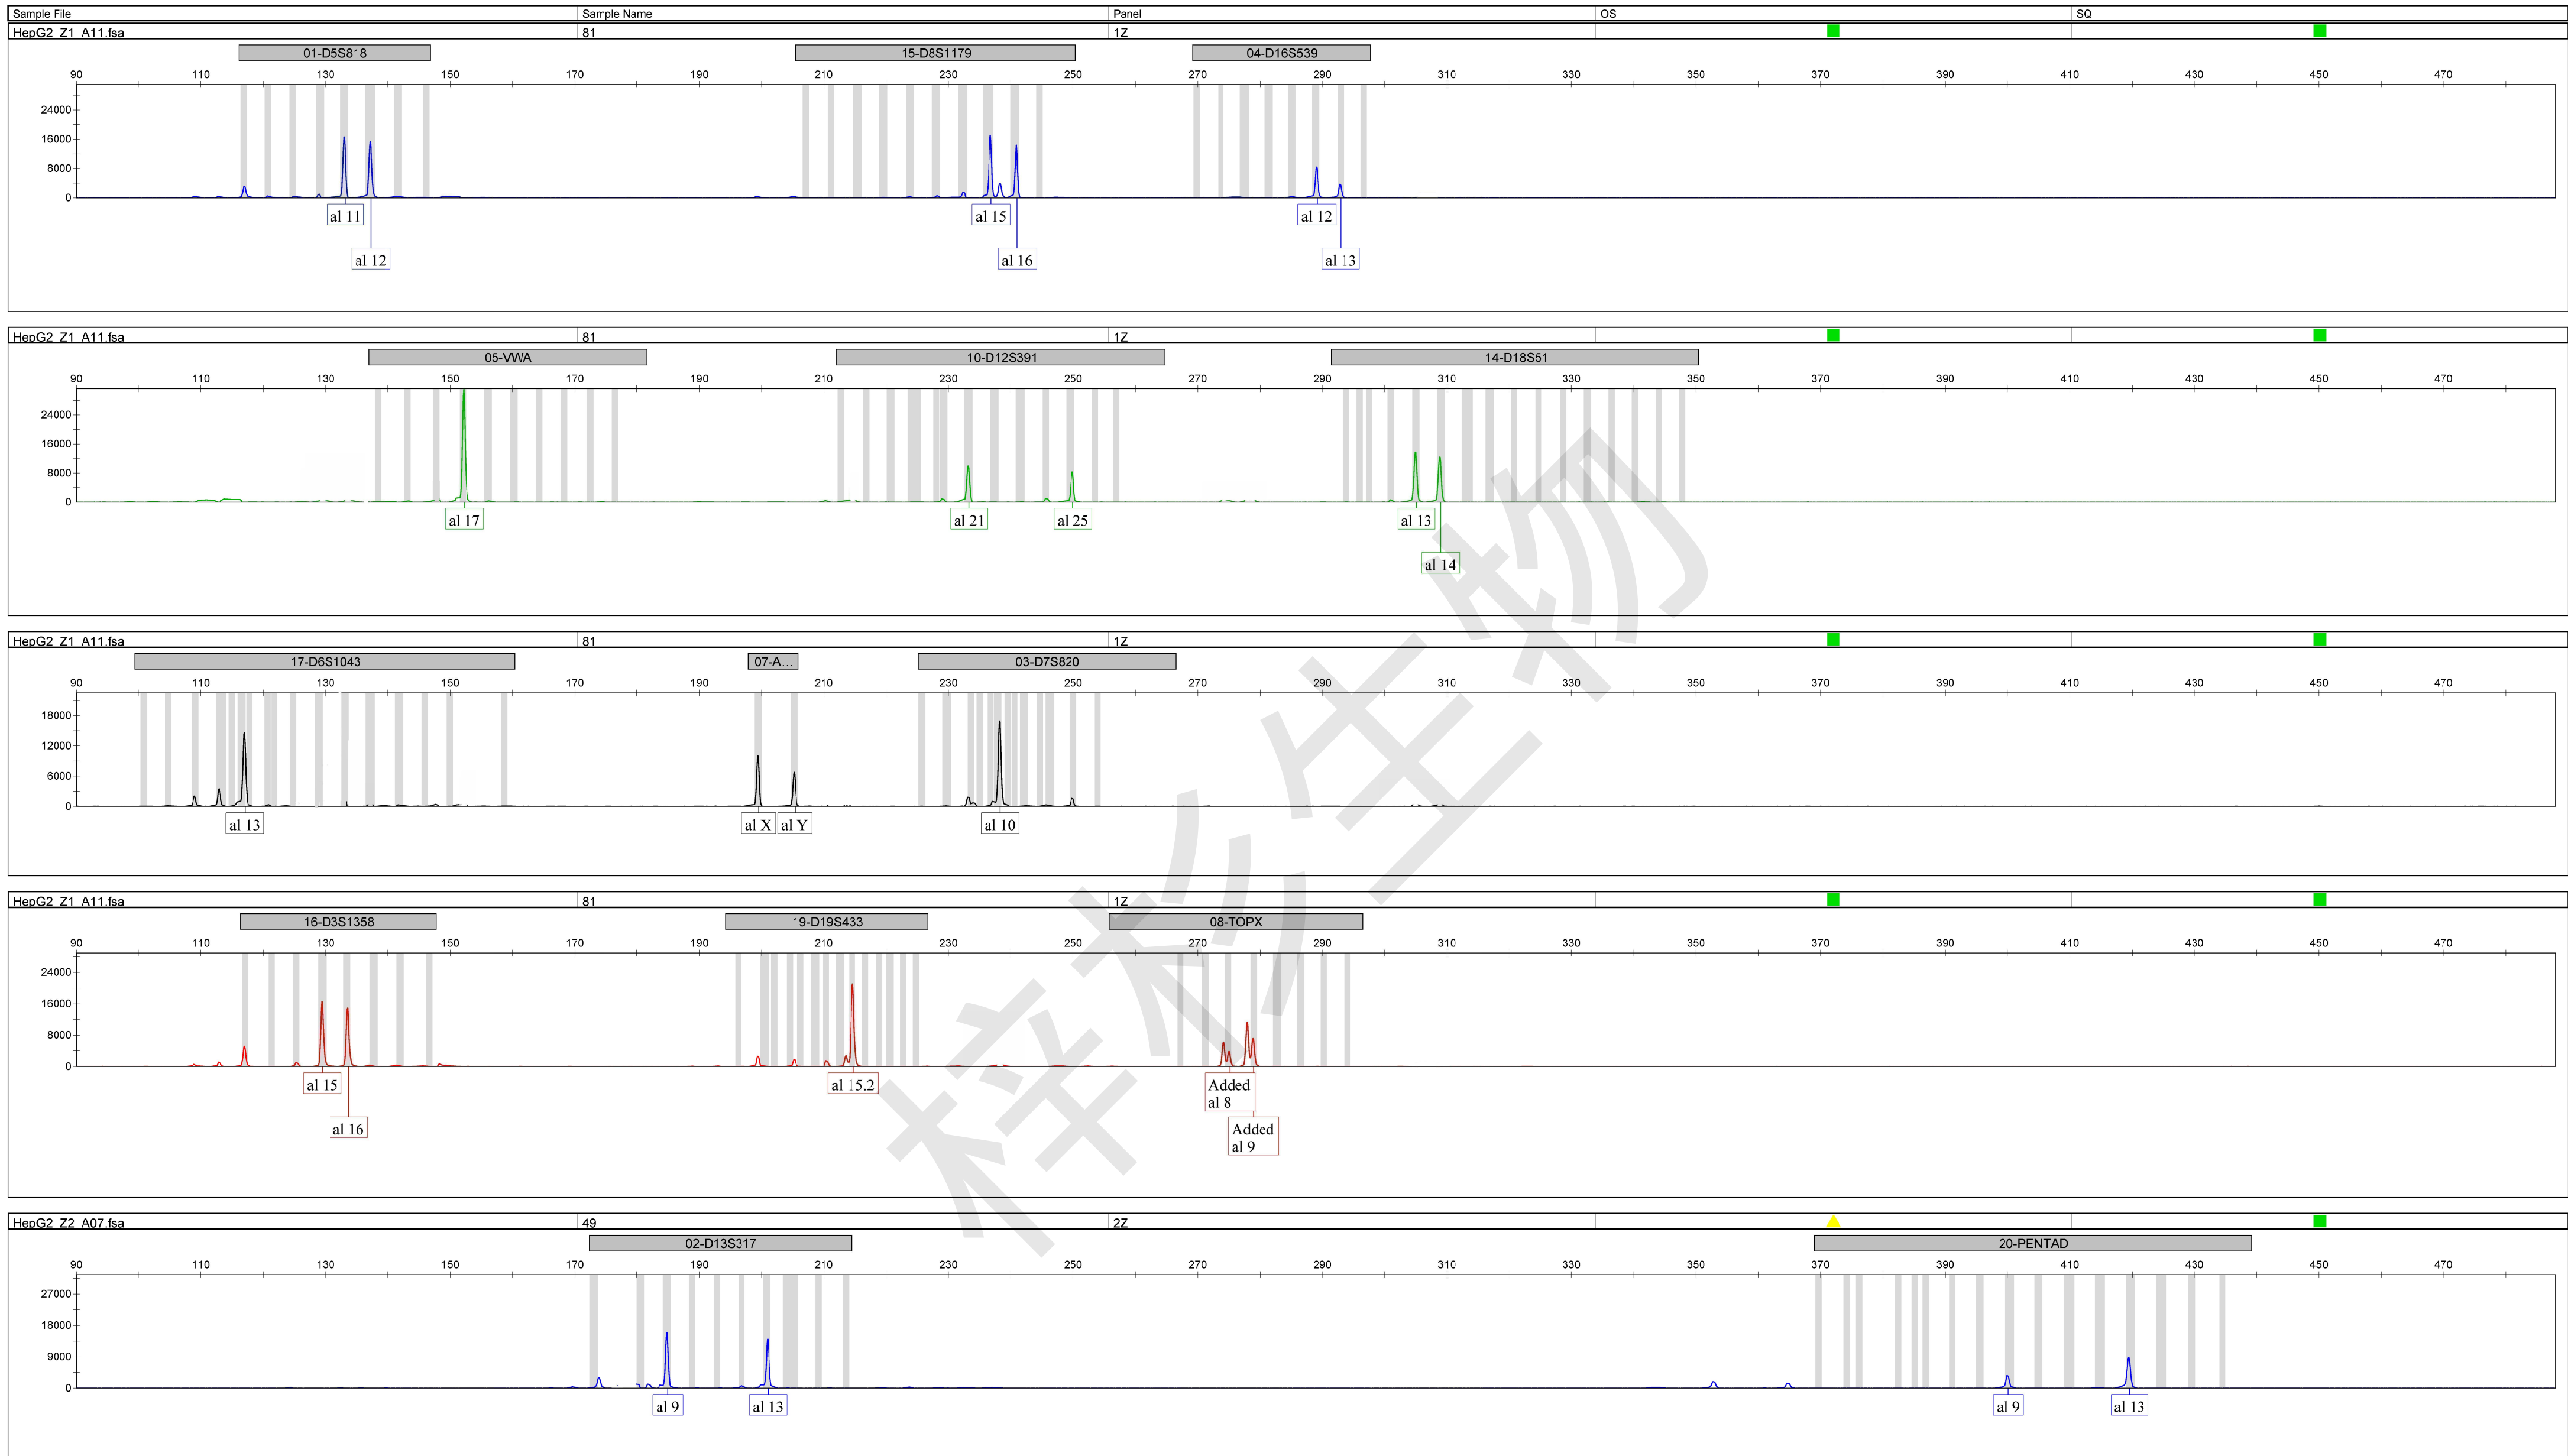

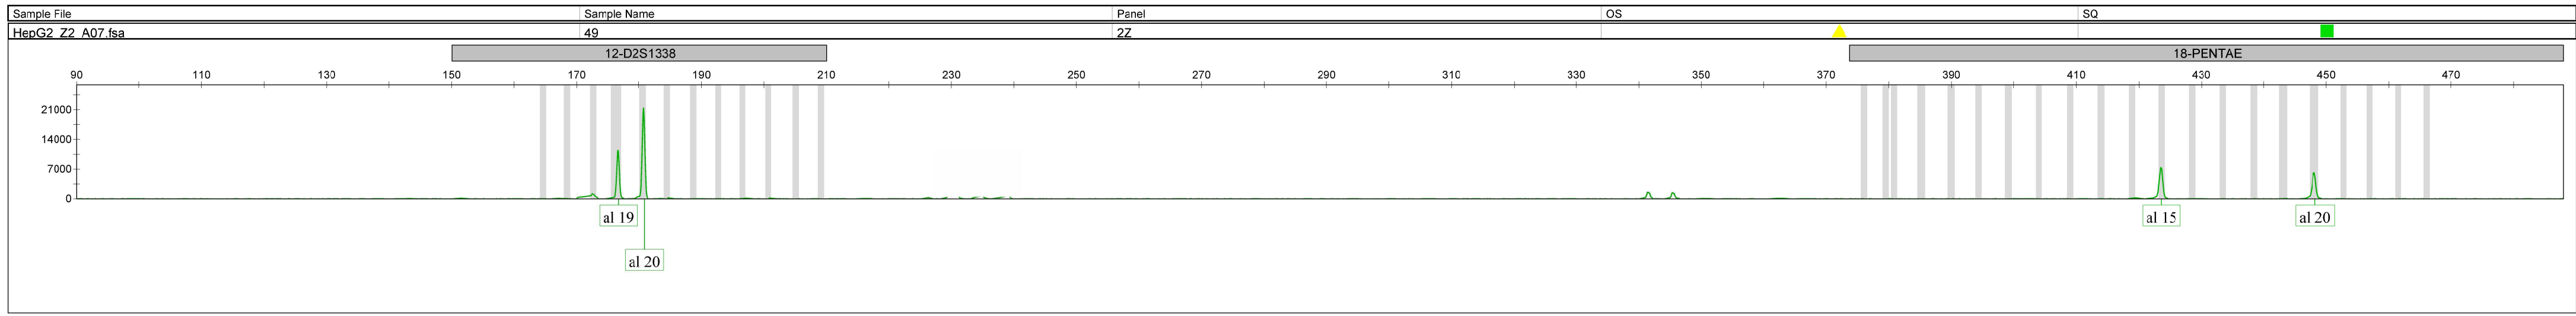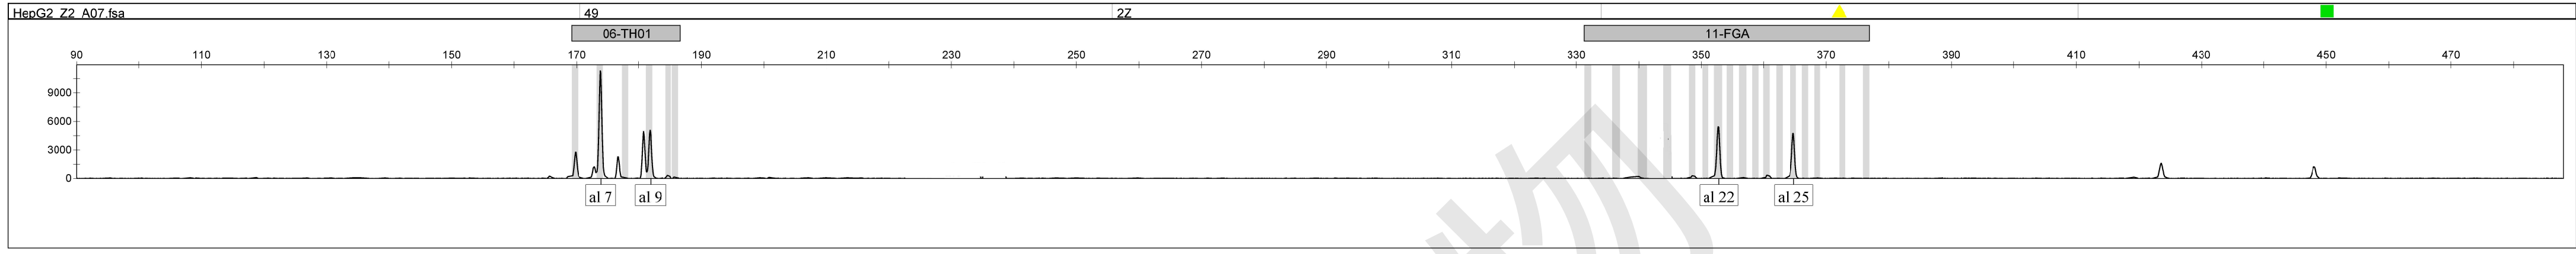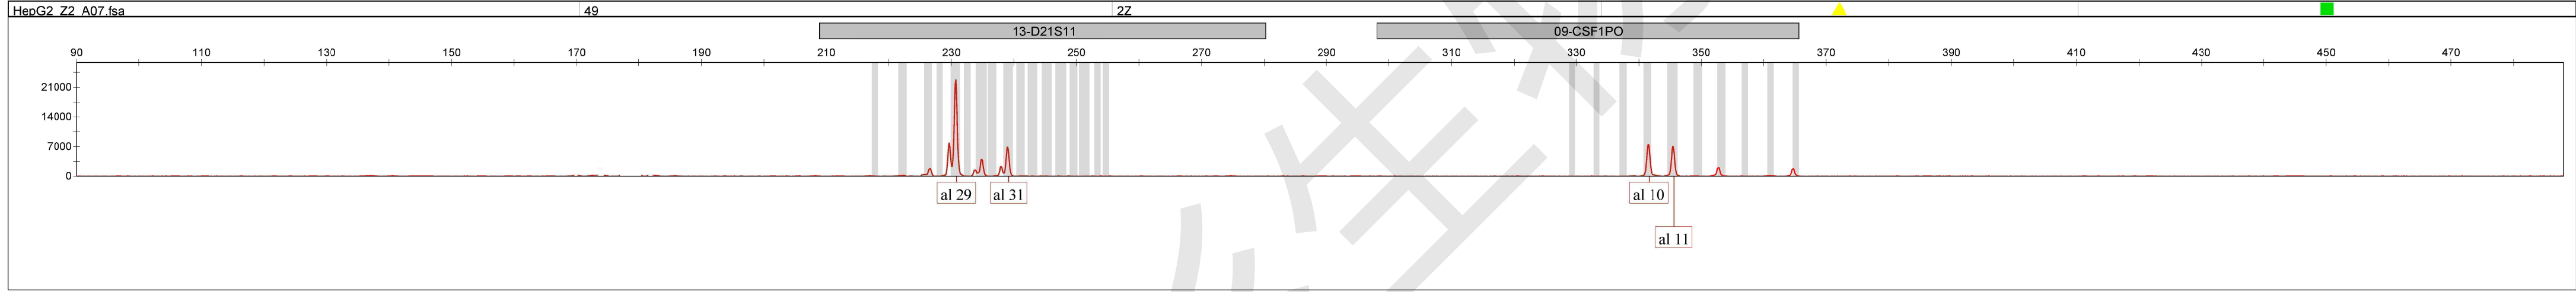

Copyright © Applied Biosystems
